# Supplementary material
Source: publisher site journal article supplement (https://www.dovepress.com/article/477451)
Supplement: Supplementary file 1 [file get_supplementary_file.php]

|  | | |
| --- | --- | --- |
| Number of victimization types | Point in time | |
| T1 | T2 |
| 0 | 1206 (57.68) | 1306 (62.46) |
| 1 | 259 (12.39) | 181 (8.66) |
| 2 | 185 (8.85) | 113 (5.40) |
| 3 | 103 (4.93) | 137 (6.55) |
| ≥4（PV） | 338 (16.16) | 354 (16.93) |

Supplementary table 1 Number of victimization types at time points T1 and T2

Supplementary table 2 Fitting indicators of latent category model for children with Poly-victimization at T1 and T2 time points

| Time | Number of Model Classes | Loglikelihood | AIC | BIC | aBIC | Entropy | aLMR | BLRT |
| --- | --- | --- | --- | --- | --- | --- | --- | --- |
| T1 | 2 | -4049.478 | 8124.956 | 8198.347 | 8157.044 | 0.715 | 0.000 | 0.000 |
|  | 3 | -3982.504 | 8005.007 | 8117.915 | 8054.373 | 0.811 | 0.000 | 0.000 |
| 4 | -3966.565 | 7987.13 | 8139.556 | 8053.774 | 0.830 | 0.0023 | 0.000 |
| 5 | -3961.579 | 7991.158 | 8183.101 | 8075.08 | 0.889 | 0.0272 | 0.2857 |
| 6 | -3957.179 | 7996.358 | 8227.819 | 8097.558 | 0.854 | 0.1992 | 0.500 |
| T2 | 2 | -4131.389 | 8288.778 | 8362.168 | 8320.866 | 0.759 | 0.000 | 0.000 |
|  | 3 | -4070.049 | 8180.099 | 8293.007 | 8229.465 | 0.788 | 0.000 | 0.000 |
| 4 | -4053.955 | 8161.911 | 8314.336 | 8228.555 | 0.841 | 0.0009 | 0.000 |
| 5 | -4047.637 | 8163.275 | 8355.218 | 8247.197 | 0.838 | 0.1375 | 1.000 |
| 6 | -4038.353 | 8158.705 | 8390.166 | 8259.905 | 0.903 | 0.1429 | 0.0000 |

Supplementary table 3 Latent class conditional probabilities by victimization type at T1 time points

|  | | | |
| --- | --- | --- | --- |
|  | Low multi-damage group | Transition groups | High child maltreatment and peer and sibling victimization group |
| Conventional crime | 0.0271 | 0.5378 | 0.6215 |
| Child maltreatment | 0.0029 | 0.0233 | 1.0000 |
| Peer and sibling victimization | 0.0315 | 0.1995 | 0.6751 |
| Sexual victimization | 0.0004 | 0.1120 | 0.1117 |
| Witnessing or indirect victimization | 0.0169 | 0.5257 | 0.5872 |
| Cyberbullying | 0.0026 | 0.2485 | 0.1855 |

Supplementary table 4 T2 conditional probability of latent class by type of victimization at point in time

|  | | | |
| --- | --- | --- | --- |
| Types of victimization | Low poly-victimization group | Transition groups | High child maltreatment and peer and sibling victimization group |
| Conventional crime | 0.0109 | 0.3217 | 0.6995 |
| Child maltreatment | 0.0058 | 0.0341 | 1.0000 |
| Peer and sibling victimization | 0.0206 | 0.3815 | 0.4516 |
| Sexual victimization | 0.0005 | 0.3266 | 0.0725 |
| Witnessing or indirect victimization | 0.0088 | 0.5497 | 0.5763 |
| Cyberbullying | 0.0010 | 0.4437 | 0.1826 |
